# Supplementary material for: Different Stages of Phase Transformation in the Synthesis of Nanocrystalline Sr-Hexaferrite Powder Prepared by a Gaseous Heat Treatment and Re-Calcination Method
Source: MDPI journal article supplement (doi:10.3390/nano12213714), 2022-10-22
Supplement: s1 [file s1]

## Different Stages of Phase Transformation in the Synthesis of Nanocrystalline Sr-Hexaferrite Powder Prepared by a Gaseous Heat Treatment and Re-Calcination Method

Ramin Dehghan <sup>1</sup>, Seyyed Ali Seyyed Ebrahimi <sup>1,\*</sup>, Zahra Lalegani <sup>1</sup> and Bejan Hamawandi <sup>2,\*</sup>

<sup>1</sup> Advanced Magnetic Materials Research Center, School of Metallurgy and Materials, University of Tehran, Tehran 11155 4563, Iran

<sup>2</sup> Department of Applied Physics, KTH Royal Institute of Technology, SE-106 91 Stockholm, Sweden

\* Correspondence: saseyyed@ut.ac.ir (S.A.S.E.); bejan@kth.se (B.H.)

**Table S1.** Phase percentages in the samples obtained by CH<sub>4</sub> heat treatment at different temperatures

| Temperature (°C) | SrFe <sub>12</sub> O <sub>19</sub> (mole) | Sr <sub>7</sub> Fe <sub>10</sub> O <sub>22</sub> (mole) | Fe <sub>2</sub> O <sub>3</sub> (mole) | Fe <sub>3</sub> O <sub>4</sub> (mole) | FeO (mole) | Fe (mole) | Fe <sub>3</sub> C (mole) |
|------------------|-------------------------------------------|---------------------------------------------------------|---------------------------------------|---------------------------------------|------------|-----------|--------------------------|
| 450              | 98.20                                     | 0.00                                                    | 1.60                                  | 0.00                                  | 0.00       | 0.00      | 0.00                     |
| 550              | 96.76                                     | 0.35                                                    | 1.86                                  | 0.92                                  | 0.00       | 0.00      | 0.00                     |
| 650              | 36.13                                     | 12.58                                                   | 44.56                                 | 6.26                                  | 0.00       | 0.00      | 0.00                     |
| 750              | 1.92                                      | 19.64                                                   | 49.62                                 | 19.74                                 | 1.53       | 0.00      | 4.83                     |
| 850              | 0.12                                      | 19.99                                                   | 34.13                                 | 0.89                                  | 0.00       | 0.00      | 33.50                    |
| 950              | 0.12                                      | 18.61                                                   | 2.49                                  | 2.75                                  | 0.66       | 13.50     | 41.27                    |
| 1050             | 0.00                                      | 16.54                                                   | 5.92                                  | 4.35                                  | 0.01       | 43.78     | 6.44                     |

**Table S2.** Amount of different phases in the samples obtained by CH<sub>4</sub> heat treatment at different temperatures (normalized on the basis of supposing that the initial amount of Fe in the sample has been 100 moles)

| Temperature (°C) | SrFe <sub>12</sub> O <sub>19</sub> (mole) | Sr <sub>7</sub> Fe <sub>10</sub> O <sub>22</sub> (mole) | Fe <sub>2</sub> O <sub>3</sub> (mole) | Fe <sub>3</sub> O <sub>4</sub> (mole) | FeO (mole) | Fe (mole) | Fe <sub>3</sub> C (mole) |
|------------------|-------------------------------------------|---------------------------------------------------------|---------------------------------------|---------------------------------------|------------|-----------|--------------------------|
| 450              | 8.18                                      | 0.00                                                    | 0.88                                  | 0.00                                  | 0.00       | 0.00      | 0.00                     |
| 550              | 8.06                                      | 0.02                                                    | 1.03                                  | 0.35                                  | 0.00       | 0.00      | 0.00                     |
| 650              | 3.01                                      | 0.73                                                    | 24.68                                 | 2.39                                  | 0.00       | 0.00      | 0.00                     |
| 750              | 0.16                                      | 1.14                                                    | 27.48                                 | 7.54                                  | 1.88       | 0.00      | 2.38                     |
| 850              | 0.01                                      | 1.16                                                    | 18.90                                 | 0.34                                  | 0.00       | 0.00      | 16.50                    |
| 950              | 0.01                                      | 1.08                                                    | 1.38                                  | 1.05                                  | 0.81       | 21.38     | 20.33                    |
| 1050             | 0.00                                      | 0.96                                                    | 3.28                                  | 1.66                                  | 0.01       | 69.33     | 3.17                     |

**Table S3.** Phase percentage in the samples gas heat treated and re-calcined at different temperatures

| Temperature<br>(°C) | SrFe <sub>12</sub> O <sub>19</sub><br>(mole) | Sr <sub>7</sub> Fe <sub>10</sub> O <sub>22</sub><br>(mole) | Fe <sub>2</sub> O <sub>3</sub><br>(mole) | Fe <sub>3</sub> O <sub>4</sub><br>(mole) | FeO<br>(mole) | Fe<br>(mole) |
|---------------------|----------------------------------------------|------------------------------------------------------------|------------------------------------------|------------------------------------------|---------------|--------------|
| 200                 | 0.12                                         | 19.81                                                      | 10.13                                    | 6.18                                     | 0.60          | 43.74        |
| 300                 | 0.00                                         | 19.81                                                      | 6.55                                     | 7.96                                     | 0.40          | 45.26        |
| 400                 | 0.00                                         | 18.78                                                      | 10.87                                    | 16.52                                    | 1.70          | 35.41        |
| 500                 | 0.96                                         | 17.23                                                      | 49.36                                    | 19.90                                    | 0.00          | 7.32         |
| 600                 | 0.00                                         | 17.40                                                      | 79.03                                    | 2.02                                     | 0.00          | 0.00         |
| 700                 | 16.81                                        | 15.85                                                      | 66.77                                    | 0.00                                     | 0.00          | 0.00         |
| 800                 | 26.89                                        | 15.00                                                      | 58.03                                    | 0.08                                     | 0.00          | 0.00         |
| 900                 | 51.02                                        | 10.85                                                      | 38.55                                    | 0.00                                     | 0.00          | 0.00         |
| 1000                | 90.28                                        | 1.72                                                       | 7.90                                     | 0.03                                     | 0.00          | 0.00         |
| 1100                | 93.40                                        | 1.03                                                       | 2.35                                     | 3.01                                     | 0.00          | 0.00         |
| 1200                | 99.16                                        | 0.00                                                       | 0.76                                     | 0.00                                     | 0.00          | 0.00         |

**Table S4.** The amount of different phases in the samples gas heat treated and re-calcined at different temperatures (normalized on the basis of supposing that the initial amount of Fe in the sample has been 100 moles)

| Temperature<br>(°C) | SrFe <sub>12</sub> O <sub>19</sub><br>(mole) | Sr <sub>7</sub> Fe <sub>10</sub> O <sub>22</sub><br>(mole) | Fe <sub>2</sub> O <sub>3</sub><br>(mole) | Fe <sub>3</sub> O <sub>4</sub><br>(mole) | FeO<br>(mole) | Fe<br>(mole) |
|---------------------|----------------------------------------------|------------------------------------------------------------|------------------------------------------|------------------------------------------|---------------|--------------|
| 200                 | 0.01                                         | 1.15                                                       | 5.61                                     | 2.36                                     | 0.74          | 69.27        |
| 300                 | 0.00                                         | 1.15                                                       | 3.63                                     | 3.04                                     | 0.49          | 71.67        |
| 400                 | 0.00                                         | 1.09                                                       | 6.02                                     | 6.31                                     | 2.09          | 56.08        |
| 500                 | 0.08                                         | 1.00                                                       | 27.34                                    | 7.60                                     | 0.00          | 11.59        |
| 600                 | 0.00                                         | 1.01                                                       | 43.77                                    | 0.77                                     | 0.00          | 0.00         |
| 700                 | 1.40                                         | 0.92                                                       | 36.98                                    | 0.00                                     | 0.00          | 0.01         |
| 800                 | 2.24                                         | 0.87                                                       | 32.14                                    | 0.03                                     | 0.00          | 0.00         |
| 900                 | 4.25                                         | 0.63                                                       | 21.35                                    | 0.00                                     | 0.00          | 0.00         |
| 1000                | 7.52                                         | 0.10                                                       | 4.37                                     | 0.01                                     | 0.00          | 0.00         |
| 1100                | 7.78                                         | 0.06                                                       | 1.30                                     | 1.15                                     | 0.00          | 0.00         |
| 1200                | 8.26                                         | 0.00                                                       | 0.42                                     | 0.00                                     | 0.00          | 0.00         |
